# Supplementary material
Source: PubMed Central journal article supplement (PMC6904231)
Supplement: EMS85134-supplement-Supplementary_Tables.pdf [file EMS85134-supplement-Supplementary_Tables.pdf]

Table S1: Total number of filaments detected in 12 micrographs when diluting the original sample Presented graphically in Figure 1c

| Repeat | Dilution Factor |     |     |
|--------|-----------------|-----|-----|
|        | 1x              | 2x  | 4x  |
| 1      | 378             | 163 | 153 |
| 2      | 571             | 213 | 149 |
| 3      | 416             | 256 | 106 |

Table S2: Total number of filaments detected in 12 micrographs after clarifying the original sample Presented graphically in Figure 2a

| Repeat | Unclearified | Clarified |
|--------|--------------|-----------|
| 1      | 330          | 319       |
| 2      | 228          | 202       |
| 3      | 175          | 155       |

Table S3: Total number of filaments detected in 12 micrographs after sonicating the sample Presented graphically in Figure 2c

| Repeat | Sonicating time (s) |     |     |     |     |
|--------|---------------------|-----|-----|-----|-----|
|        | 0                   | 5   | 10  | 30  | 60  |
| 1      | 202                 | 199 | 232 | 205 | 232 |
| 2      | 155                 | 191 | 181 | 207 | 220 |
| 3      | 165                 | 216 | 187 | 174 | 170 |

Table S4: Total number of filaments detected in 12 micrographs after repeatedly pipetting the sample Presented graphically in Figure 2e

| Repeat | Pipette actions |     |     |     |
|--------|-----------------|-----|-----|-----|
|        | 0               | 5   | 10  | 30  |
| 1      | 202             | 201 | 199 | 176 |
| 2      | 155             | 195 | 166 | 143 |
| 3      | 205             | 203 | 178 | 165 |

Table S5: Total number of filaments detected in 12 micrographs after vortexing the sample Presented graphically in Figure 2g

| Repeat | Vortexing time (s) |     |     |     |     |
|--------|--------------------|-----|-----|-----|-----|
|        | 0                  | 5   | 10  | 30  | 60  |
| 1      | 237                | 238 | 216 | 226 | 146 |
| 2      | 200                | 180 | 155 | 171 | 167 |
| 3      | 762                | 669 | 780 | 660 | 621 |

Table S6: Total number of filaments detected in 12 micrographs after freeze-thawing the sample Presented graphically in Figure 2i

| Repeat | Freeze-thaw cycles |     |     |     |     |
|--------|--------------------|-----|-----|-----|-----|
|        | 0                  | 1   | 2   | 3   | 4   |
| 1      | 658                | 315 | 258 | 98  | 164 |
| 2      | 325                | 200 | 160 | 75  | 55  |
| 3      | 303                | 212 | 108 | 115 | 68  |

Table S7: Total number of filaments detected in 12 micrographs after incubating the sample at room temperature

Presented graphically in Figure 4a

| Repeat | Incubation time (h) |     |     |     |     |     |
|--------|---------------------|-----|-----|-----|-----|-----|
|        | 0                   | 8   | 24  | 48  | 96  | 120 |
| 1      | 879                 | 786 | 906 | 864 | 837 | 609 |
| 2      | 432                 | 519 | 606 | 497 | 433 | 456 |
| 3      | 885                 | 553 | 580 | 523 | 500 | 542 |

Table S8: Total number of filaments detected in 12 micrographs after incubating the sample at 5 °C

Presented graphically in Figure 4a

| Repeat | Incubation time (h) |     |     |     |     |     |
|--------|---------------------|-----|-----|-----|-----|-----|
|        | 0                   | 8   | 24  | 48  | 96  | 120 |
| 1      | 879                 | 840 | 636 | 750 | 630 | 621 |
| 2      | 432                 | 471 | 412 | 413 | 388 | 346 |
| 3      | 885                 | 664 | 462 | 546 | 541 | 456 |

Table S9: Total number of filaments detected in 12 micrographs after freeze-thawing the sample in different conditions

Presented graphically in Figure 5b

| Repeat | Unfrozen | Freezing condition |      |      |           |
|--------|----------|--------------------|------|------|-----------|
|        |          | Standard           | Snap | DMSO | Snap+DMSO |
| 1      | 453      | 187                | 306  | 401  | n.d       |
| 2      | 146      | 101                | 119  | 107  | n.d.      |
| 3      | 230      | 120                | 127  | 177  | n.d.      |
| 4      | 264      | 201                | ve a | 280  | 352       |
| 5      | 325      | 162                | 193  | 381  | 380       |
| 6      | 65       | 62                 | 73   | 84   | 86        |

Table S10: Plaque-forming units per ml after incubating the sample at room temperature

Presented graphically in Figure 4e

| Repeat | Incubation time (h) |         |         |        |         |        |
|--------|---------------------|---------|---------|--------|---------|--------|
|        | 0                   | 8       | 24      | 48     | 96      | 120    |
| 1      | 3200000             | 2150000 | 900000  | 300000 | 65000   | 69000  |
| 2      | 5400000             | 4400000 | 1700000 | 950000 | 2650000 | 90000  |
| 3      | 2350000             | 3200000 | 1650000 | 900000 | 700000  | 305000 |

Table S11: Plaque-forming units per ml after incubating the sample at 5 °C

Presented graphically in Figure 4e

| Repeat | Incubation time (h) |         |         |         |         |         |
|--------|---------------------|---------|---------|---------|---------|---------|
|        | 0                   | 8       | 24      | 48      | 96      | 120     |
| 1      | 3200000             | 2850000 | 3350000 | 3050000 | 350000  | 550000  |
| 2      | 5400000             | 3800000 | 1700000 | 2850000 | 3650000 | 1550000 |
| 3      | 2350000             | 2800000 | 1200000 | 2700000 | 2300000 | 2150000 |

Table S12: Plaque-forming units per ml after freeze-thawing the sample in different conditions  
Presented graphically in Figure 5a

| Repeat | Unfrozen | Freezing condition |          |          |             |
|--------|----------|--------------------|----------|----------|-------------|
|        |          | Standard           | Snap     | DMSO     | Snap + DMSO |
| 1      | 14750    | 14000              | 9750     | 32500    | n.d.        |
| 2      | 26500    | 18750              | 30250    | 27250    | n.d.        |
| 3      | 72500    | 60000              | 40000    | 70000    | 72500       |
| 4      | 75000    | 42500              | 27000    | n.d.     | 24500       |
| 5      | 16000000 | 11000000           | 12500000 | 15750000 | 16750000    |
